# Supplementary material for: Therapeutic effect of localized vibration on alveolar bone of osteoporotic rats
Source: PubMed Central journal article supplement (PMC6350965; doi:10.1371/journal.pone.0211004), 2019-01-29
Supplement: pone.0211004.s001.pdf [file pone.0211004.s001.pdf]

**S 1 Table:** Composition of the normal AIN-93M diet consisting of 3.5% mineral mixture (modified from Nakada et al., 2011, Journal of Hard Tissue Biology , p107-114)

| Composition            | %                    |
|------------------------|----------------------|
| Mineral Mixture        | 3.5                  |
| Casein                 | $1.4 \times 10^{+1}$ |
| L-Cystine              | $1.8 \times 10^{-1}$ |
| $\beta$ - Cornstarch   | $4.7 \times 10^{+1}$ |
| $\alpha$ -Cornstarch   | $1.6 \times 10^{+1}$ |
| Sucrose                | $1.0 \times 10^{+1}$ |
| Soybean Oil            | 4.0                  |
| Cellulose Powder       | 5.0                  |
| Vitamin                | 1.0                  |
| Choline Bitartrate     | 0.3                  |
| Tert-Butylhydroquinone | $0.8 \times 10^{-3}$ |

| Composition of 3.5% minerals                                                   | Minerals (%)         |
|--------------------------------------------------------------------------------|----------------------|
| CaCO <sub>3</sub>                                                              | 1.2                  |
| KH <sub>2</sub> PO <sub>4</sub>                                                | $8.8 \times 10^{-1}$ |
| K <sub>3</sub> C <sub>6</sub> H <sub>5</sub> O <sub>7</sub> · H <sub>2</sub> O | $9.8 \times 10^{-2}$ |
| NaCl                                                                           | $2.6 \times 10^{-1}$ |
| K <sub>2</sub> SO <sub>4</sub>                                                 | $1.6 \times 10^{-1}$ |
| MgO                                                                            | $8.4 \times 10^{-2}$ |
| FeC <sub>6</sub> H <sub>5</sub> O <sub>7</sub> · x H <sub>2</sub> O            | $2.1 \times 10^{-2}$ |
| ZnCO <sub>3</sub>                                                              | $5.8 \times 10^{-3}$ |
| MnCO <sub>3</sub>                                                              | $2.2 \times 10^{-3}$ |
| CuCO <sub>3</sub> · Cu(OH) <sub>2</sub> · H <sub>2</sub> O                     | $1.1 \times 10^{-3}$ |
| KIO <sub>3</sub>                                                               | $3.5 \times 10^{-5}$ |
| Na <sub>2</sub> SeO <sub>4</sub>                                               | $3.6 \times 10^{-5}$ |
| (NH <sub>4</sub> )Mo <sub>7</sub> O <sub>24</sub> · 4 H <sub>2</sub> O         | $2.8 \times 10^{-5}$ |
| Na <sub>2</sub> SiO <sub>3</sub> · 9 H <sub>2</sub> O                          | $5.1 \times 10^{-3}$ |
| CrK(SO <sub>4</sub> ) <sub>2</sub> · 12 H <sub>2</sub> O                       | $9.6 \times 10^{-4}$ |
| LiCl                                                                           | $6.1 \times 10^{-5}$ |
| H <sub>3</sub> BO <sub>3</sub>                                                 | $2.9 \times 10^{-4}$ |
| NaF                                                                            | $2.2 \times 10^{-4}$ |
| NiCO <sub>3</sub> · 2 Ni(OH) <sub>2</sub> · 4 H <sub>2</sub> O                 | $1.1 \times 10^{-4}$ |
| NH <sub>4</sub> VO <sub>3</sub>                                                | $2.3 \times 10^{-5}$ |
| Sucrose                                                                        | $7.3 \times 10^{-1}$ |
